# Supplementary material
Source: publisher figshare collection journal article supplement (https://tandf.figshare.com/articles/dataset/_/13084199)
Supplement: Supplementary file 1 [file 1]

## Electronic Supplementary Information

### Molecular recognition of acetylcholinesterase and its subnanomolar reversible inhibitor: a molecular simulations study

Maja Vitorović-Todorović<sup>1\*</sup>, Ilija Cvijetić<sup>2</sup>, Mire Zloh<sup>3,4</sup> Andrej Perdih<sup>5</sup>

<sup>1</sup>Military Technical Institute; Ratka Resanovića 1, Belgrade, Serbia; [mvitod@chem.bg.ac.rs](mailto:mvitod@chem.bg.ac.rs)

<sup>2</sup>Innovation Center of the Faculty of Chemistry, University of Belgrade, Serbia; [ilija@chem.bg.ac.rs](mailto:ilija@chem.bg.ac.rs)

<sup>3</sup>University Business Academy, Faculty of Pharmacy, Trg Mladenaca 5, Novi Sad, Serbia, [zloh@live.co.uk](mailto:zloh@live.co.uk)

<sup>4</sup>Nanopuzzle Medicines Design Ltd, Bessemer Road, Stevenage, United Kingdom

<sup>5</sup>National Institute of Chemistry, Hajdrihova 19, 1000 Ljubljana, Slovenia, [andrej.perdih@ki.si](mailto:andrej.perdih@ki.si),

\* Correspondance: [mvitod@chem.bg.ac.rs](mailto:mvitod@chem.bg.ac.rs); Tel.: +381-11-3401-255 (M.V.T)

**Table S1.** The partial atomic charges for the ligand in all six Trajectories.

Ligand trajectory 1

|     |        |        |     |        |        |
|-----|--------|--------|-----|--------|--------|
| O1  | OG2D1  | -0.486 | C21 | CG321  | -0.112 |
| C23 | CG2O1  | 0.446  | N1  | NG2R60 | -0.658 |
| N4  | NG2S1  | -0.515 | C2  | CG2R61 | 0.372  |
| C24 | CG2R61 | 0.139  | C3  | CG2R61 | -0.003 |
| H10 | HGP1   | 0.332  | C5  | CG2R61 | 0.078  |

|     |        |        |     |        |        |
|-----|--------|--------|-----|--------|--------|
| C22 | CG311  | 0.032  | C7  | CG2R61 | -0.021 |
| C30 | CG321  | -0.161 | C9  | CG2R61 | 0.298  |
| C31 | CG2O5  | 0.337  | N2  | NG311  | -0.415 |
| O2  | OG2D3  | -0.470 | H8  | HGPAM1 | 0.338  |
| C32 | CG2R61 | 0.122  | C14 | CG321  | -0.168 |
| N3  | NG311  | -0.406 | C21 | CG321  | -0.112 |
| H45 | HGPAM1 | 0.300  | N1  | NG2R60 | -0.658 |

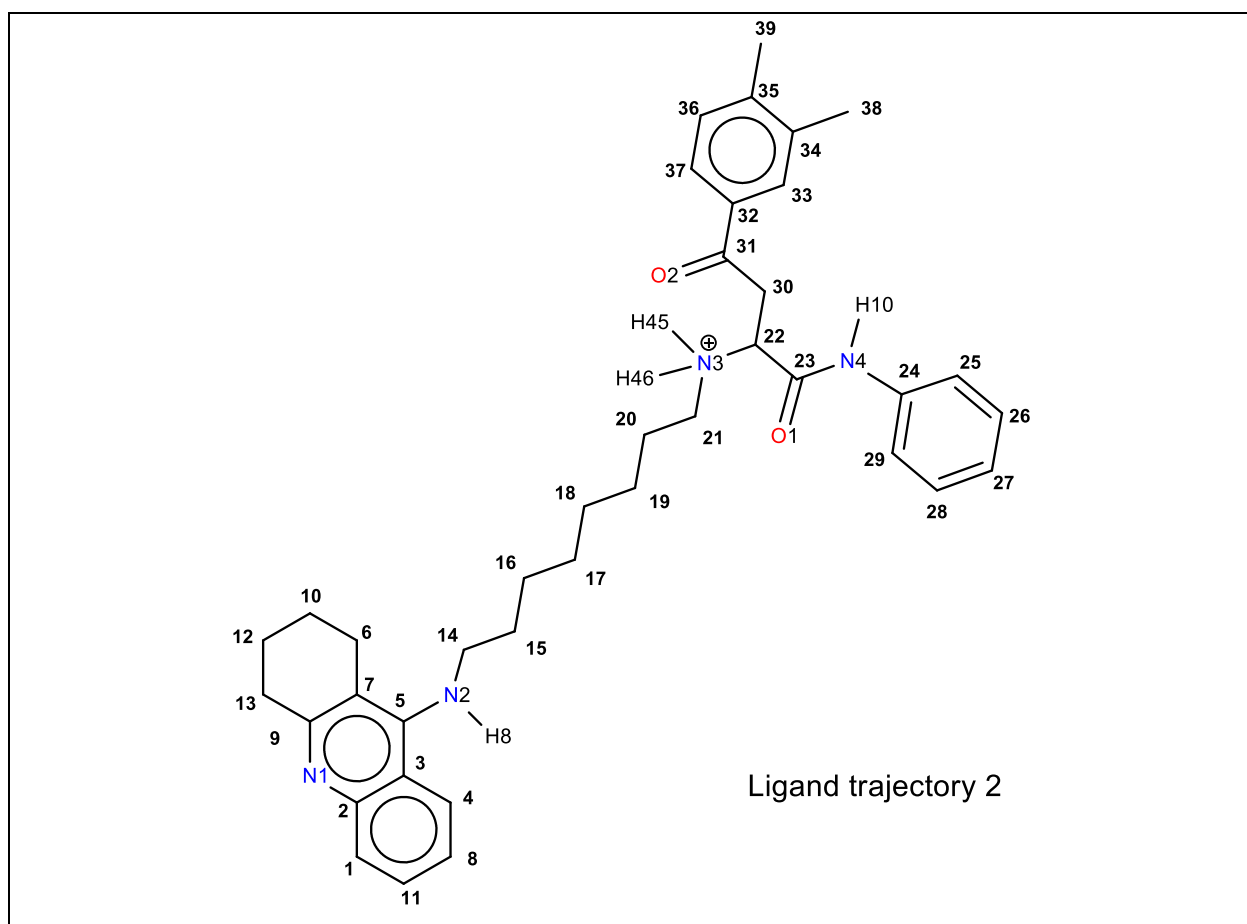

|     |        |        |     |        |        |
|-----|--------|--------|-----|--------|--------|
| O1  | OG2D1  | -0.490 | H46 | HGP2   | 0.320  |
| C23 | CG2O1  | 0.397  | C21 | CG324  | 0.175  |
| N4  | NG2S1  | -0.395 | N1  | NG2R60 | -0.658 |
| C24 | CG2R61 | 0.139  | C2  | CG2R61 | 0.372  |
| H10 | HGP1   | 0.318  | C3  | CG2R61 | -0.003 |
| C22 | CG314  | 0.358  | C5  | CG2R61 | 0.078  |
| C30 | CG321  | -0.177 | C7  | CG2R61 | -0.021 |
| C31 | CG2O5  | 0.337  | C9  | CG2R61 | 0.298  |
| O2  | OG2D3  | -0.470 | N2  | NG311  | -0.415 |

|     |        |        |     |        |        |
|-----|--------|--------|-----|--------|--------|
| C32 | CG2R61 | 0.122  | H8  | HGPAM1 | 0.338  |
| N3  | NG3P2  | -0.384 | C14 | CG321  | -0.168 |
| H45 | HGP2   | 0.320  |     |        |        |

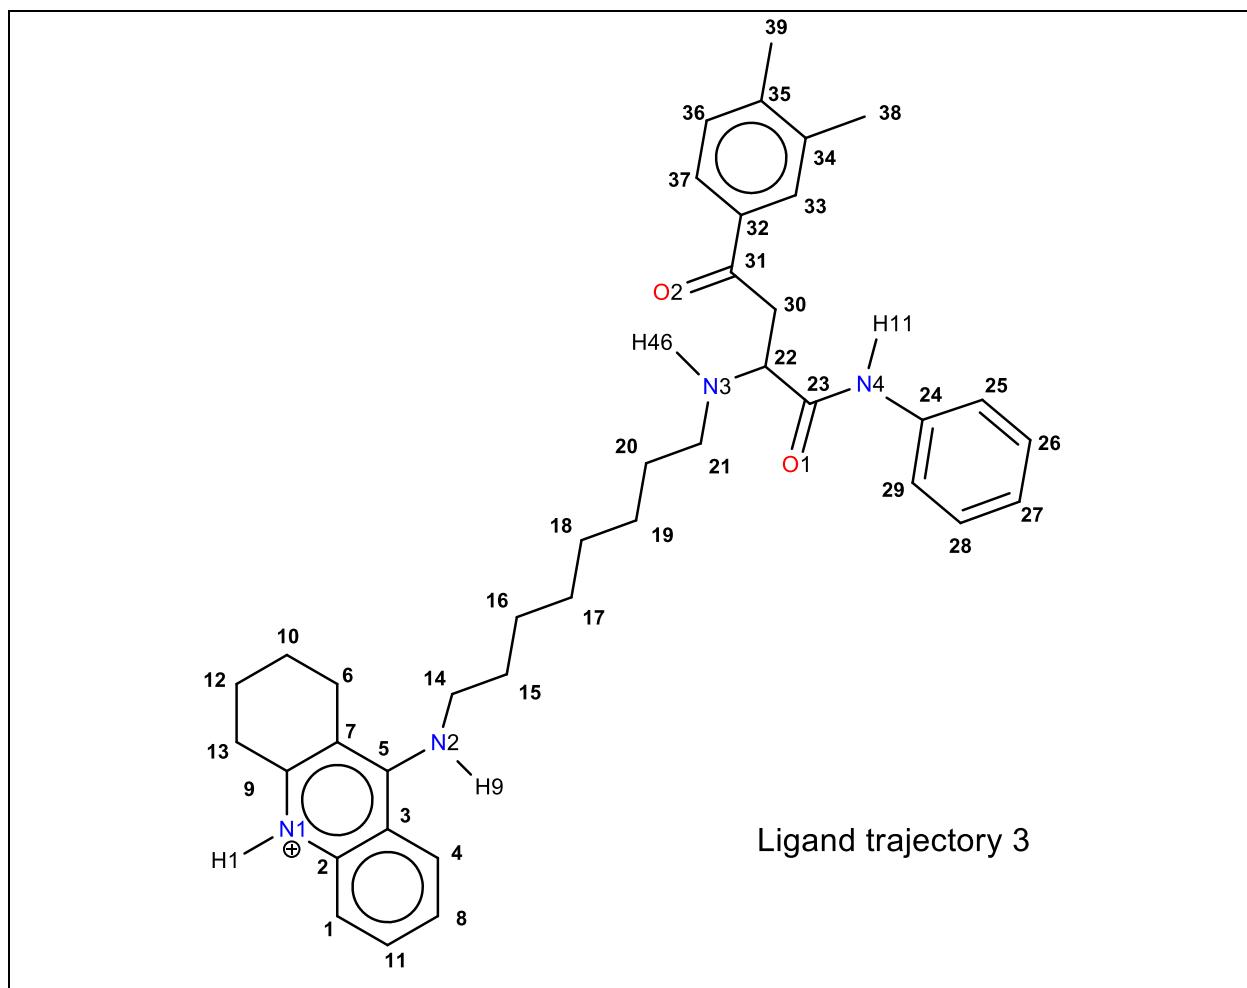

|     |        |        |     |        |        |
|-----|--------|--------|-----|--------|--------|
| O1  | OG2D1  | -0.486 | C21 | CG324  | -0.112 |
| C23 | CG2O1  | 0.446  | N1  | NG2R61 | -0.070 |
| N4  | NG2S1  | -0.515 | H1  | HGP2   | 0.456  |
| C24 | CG2R61 | 0.139  | C2  | CG2R61 | 0.096  |
| H11 | HGP1   | 0.332  | C3  | CG2R61 | 0.031  |
| C22 | CG311  | 0.032  | C5  | CG2R61 | 0.115  |
| C30 | CG321  | -0.161 | C7  | CG2R61 | 0.088  |
| C31 | CG2O5  | 0.337  | C9  | CG2R61 | 0.228  |

|     |        |        |     |        |        |
|-----|--------|--------|-----|--------|--------|
| O2  | OG2D3  | -0.470 | N2  | NG311  | -0.415 |
| C32 | CG2R61 | 0.122  | H9  | HGPAM1 | 0.338  |
| N3  | NG311  | -0.406 | C14 | CG321  | -0.168 |
| H46 | HGPAM1 | 0.300  |     |        |        |

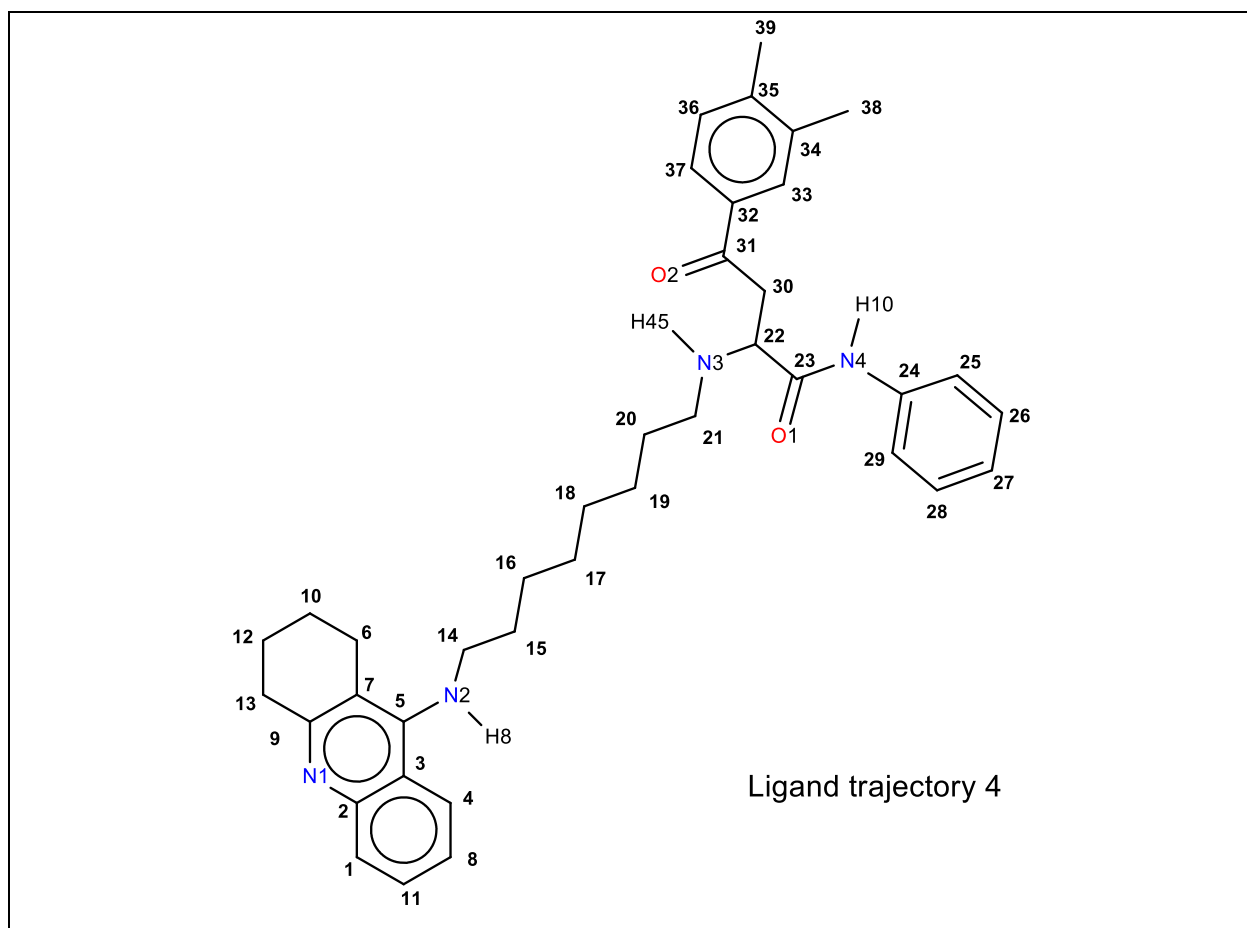

|     |        |         |     |        |        |
|-----|--------|---------|-----|--------|--------|
| O1  | OG2D1  | -0.486  | H45 | HGPAM1 | 0.300  |
| C23 | CG2O1  | 0.428   | C21 | CG321  | 0.002  |
| N4  | NG2S1  | -0.506  | N1  | NG2R60 | -0.658 |
| C24 | CG2R61 | 0.145   | C2  | CG2R61 | 0.328  |
| H10 | HGP1   | 0.331   | C3  | CG2R61 | -0.024 |
| C22 | CG311  | 0.152   | C5  | CG2R61 | 0.064  |
| C30 | CG321  | -0.158  | C7  | CG2R61 | -0.004 |
| C31 | CG2O5  | 0.333   | C9  | CG2R61 | 0.349  |
| O2  | OG2D3  | -0.4700 | N2  | NG311  | -0.548 |

|     |        |        |     |        |        |
|-----|--------|--------|-----|--------|--------|
| C32 | CG2R61 | 0.121  | H8  | HGPAM1 | 0.338  |
| N3  | NG311  | -0.647 | C14 | CG321  | -0.034 |

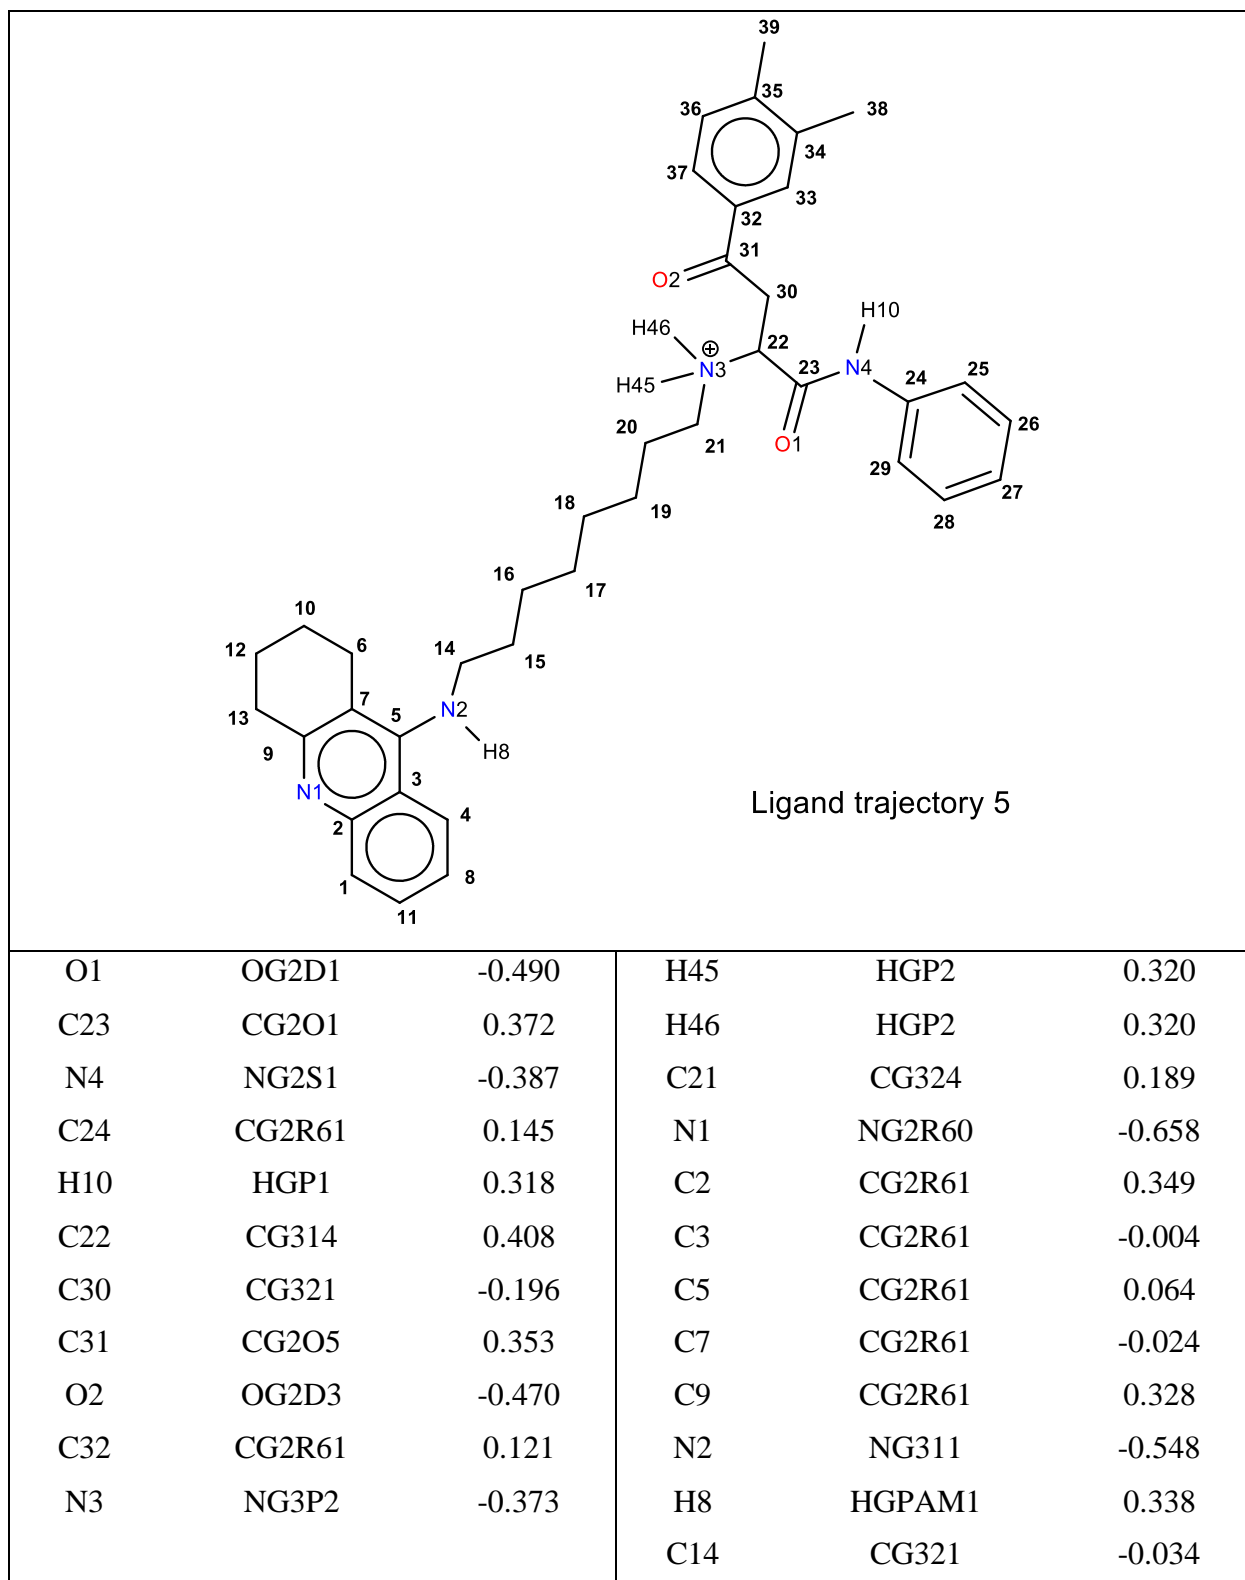

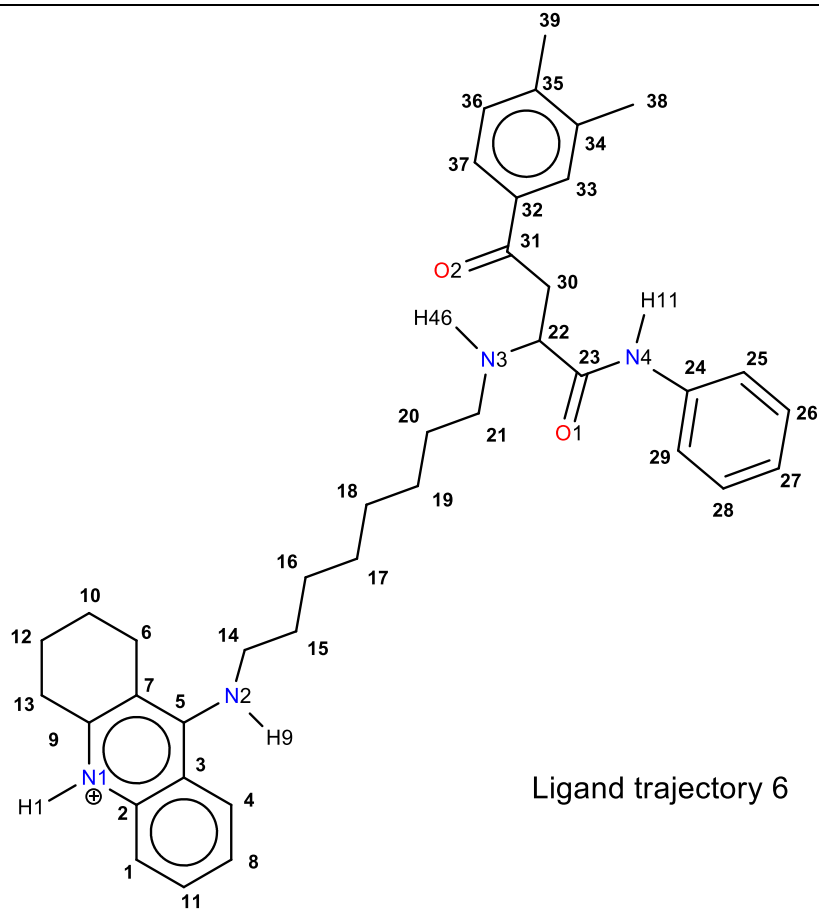

Ligand trajectory 6

|     |        |        |     |        |        |
|-----|--------|--------|-----|--------|--------|
| O1  | OG2D1  | -0.486 | C21 | CG324  | -0.112 |
| C23 | CG2O1  | 0.428  | N1  | NG2R61 | -0.058 |
| N4  | NG2S1  | -0.506 | H1  | HGP2   | 0.414  |
| C24 | CG2R61 | 0.145  | C2  | CG2R61 | 0.298  |
| H11 | HGP1   | 0.332  | C3  | CG2R61 | 0.124  |
| C22 | CG311  | 0.152  | C5  | CG2R62 | 0.075  |
| C30 | CG321  | -0.158 | C7  | CG2R61 | 0.029  |
| C31 | CG2O5  | 0.333  | C9  | CG2R62 | 0.031  |
| O2  | OG2D3  | -0.470 | N2  | NG311  | -0.548 |
| C32 | CG2R61 | 0.121  | H9  | HGPAM1 | 0.338  |
| N3  | NG311  | -0.548 | C14 | CG321  | 0.075  |
| H46 | HGPAM1 | 0.338  |     |        |        |

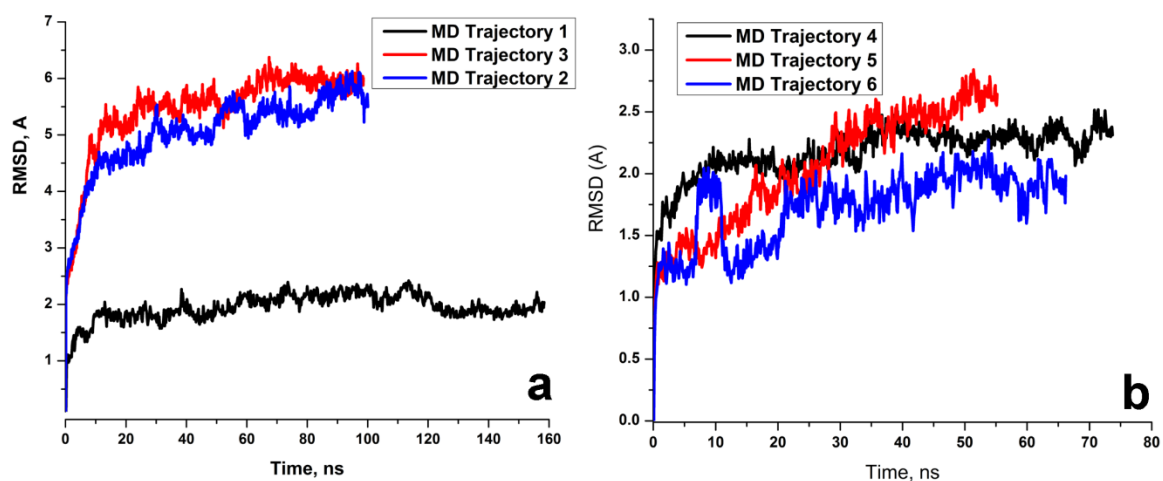

**Figure S2.** The Root Mean Square Deviation (RMSD) for the MD trajectories 1-3 (a) and Trajectories 4-6 (b).

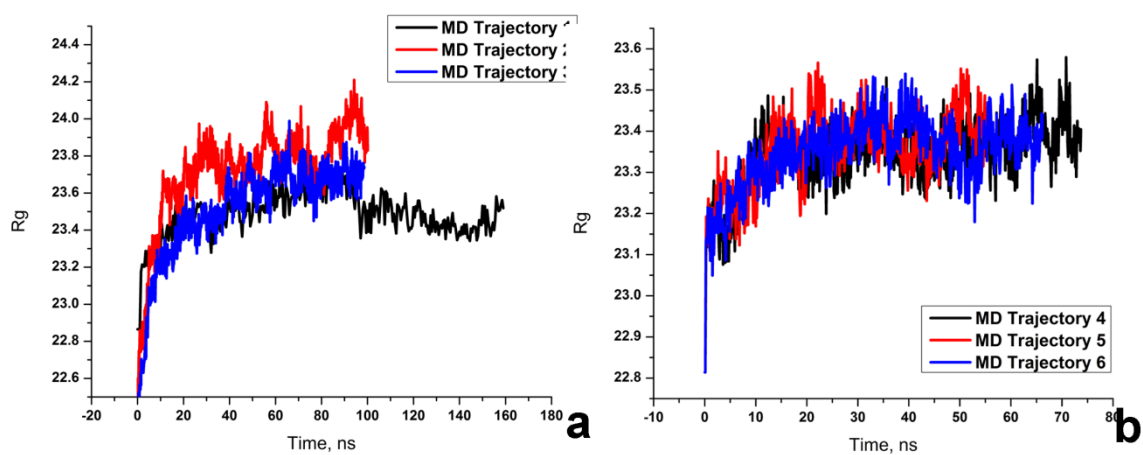

**Figure S3.** Radius of gyration (Rg) for the MD trajectories 1-3 (a) and Trajectories 4-6 (b).

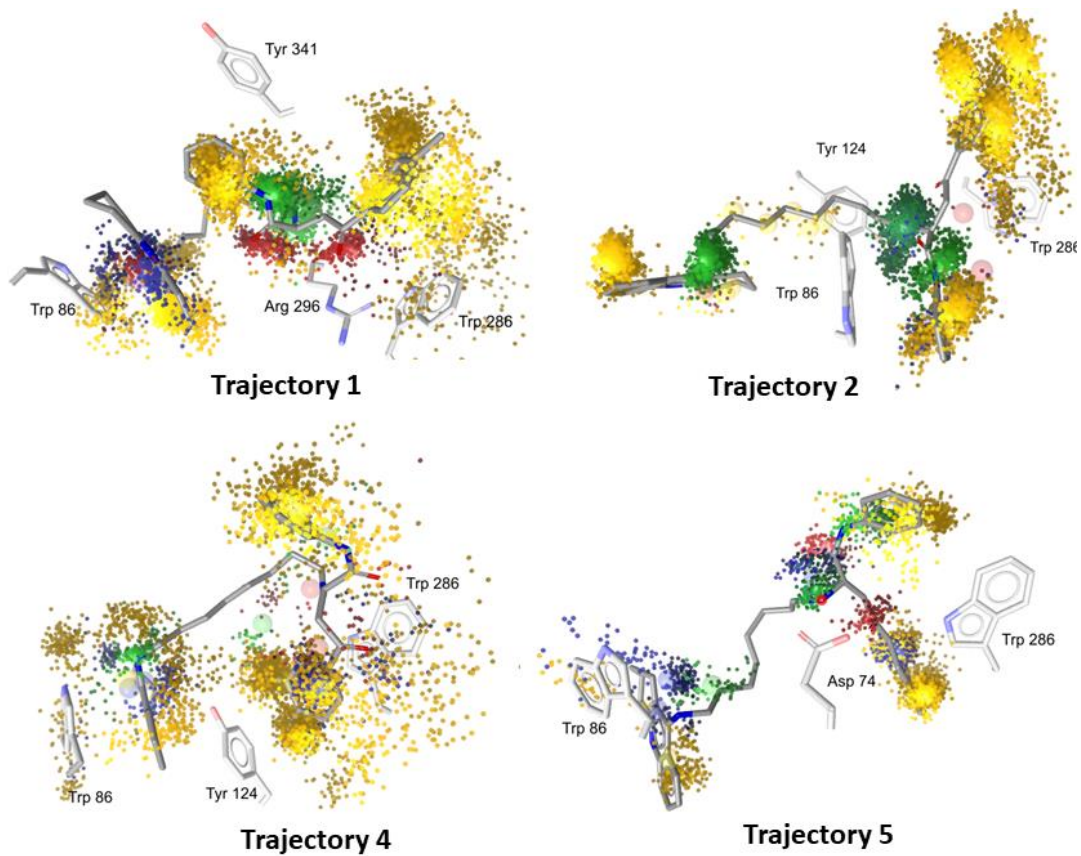

**Figure S4.** 3D representation of the dynophores for the selected MD trajectories



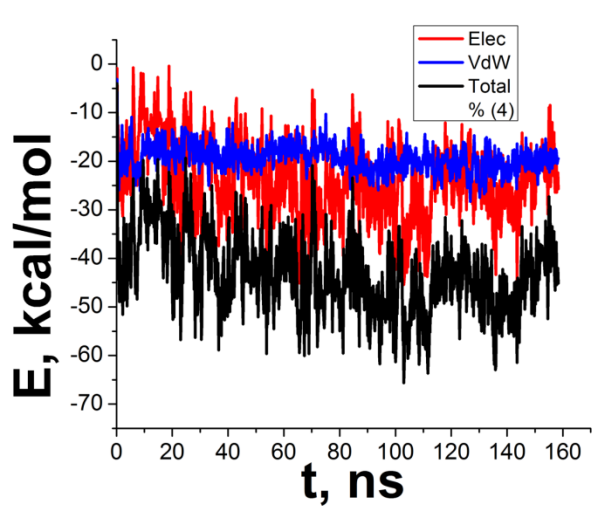

Trajectory 1

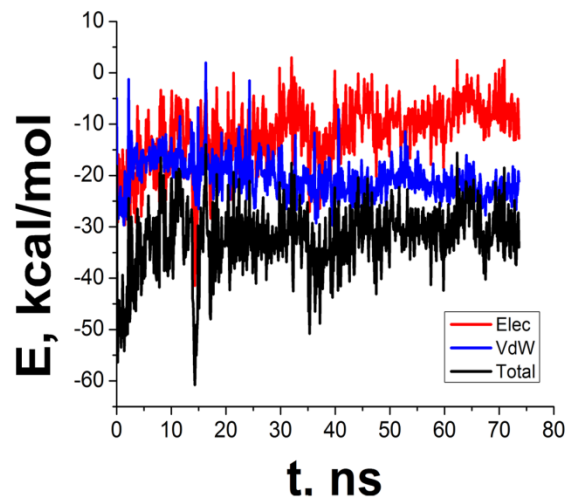

Trajectory 4

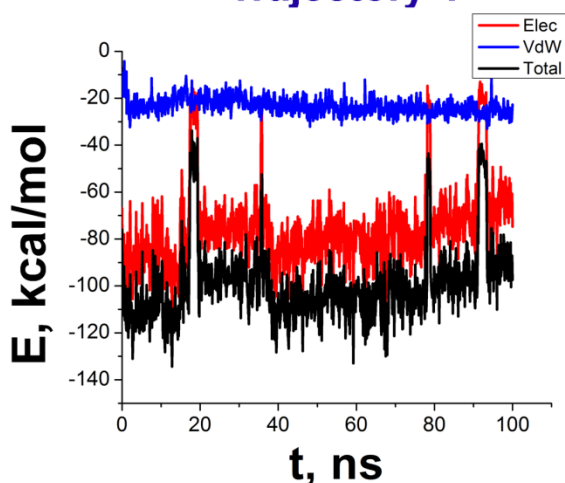

Trajectory 2

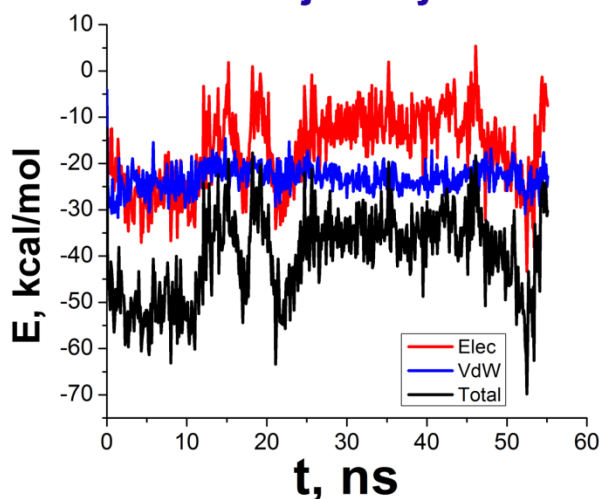

Trajectory 5

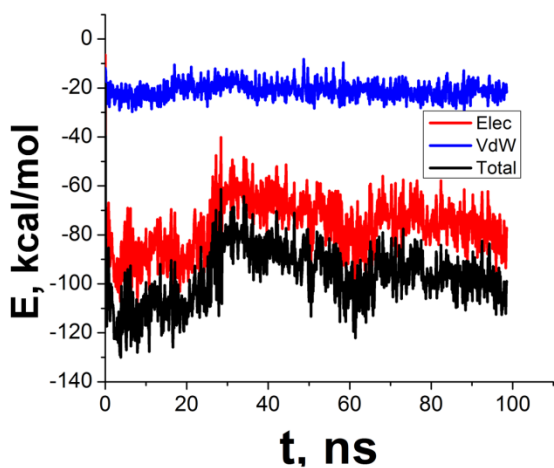

Trajectory 3

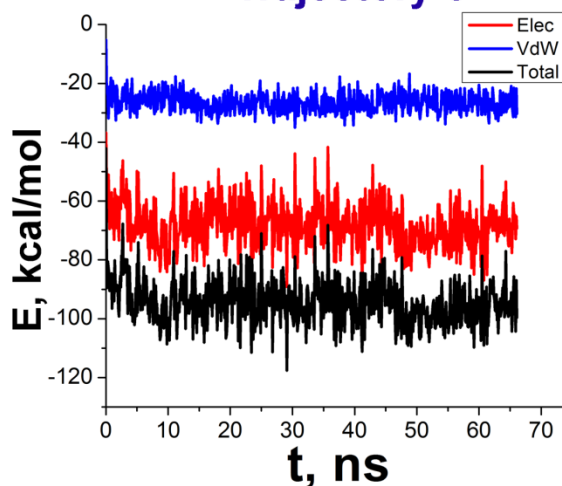

Trajectory 6

**Figure S5.** The variation of the electrostatic, van der Waals and total energy of interaction for the trajectories 1-6.

**Table 6.** The electrostatic, the van der Waals and the total contributions of the individual amino acid residues to the overall energy of the binding for the trajectories 1-3. The first 10 ns of the trajectories were omitted from calculations. The contributions over -1 kcal/mol are considered as significant and represented in bold.

| Residue       | Trajectory 1 |        |               | Trajectory 2 |        |                | Trajectory 3 |        |               |
|---------------|--------------|--------|---------------|--------------|--------|----------------|--------------|--------|---------------|
|               | Elec.        | VdW    | Total         | Elec.        | VdW    | Total          | Elec         | VdW    | Total         |
| <b>Tyr72</b>  | -0.390       | -0.261 | -0.651        | 0.045        | /      | 0.044          | 0.017        | /      | 0.017         |
| <b>Asp74</b>  | -0.465       | -0.226 | -0.691        | -56.800      | 2.167  | <b>-54.633</b> | -7.059       | -0.875 | <b>-7.934</b> |
| <b>Thr75</b>  | -0.811       | -0.391 | <b>-1.202</b> | -1.026       | -0.283 | <b>-1.309</b>  | 0.222        | -0.703 | -0.481        |
| <b>Leu76</b>  | -1.565       | -1.272 | <b>-2.837</b> | 0.040        | -0.038 | 0.002          | -0.137       | -0.710 | -0.846        |
| <b>Tyr77</b>  | 0.288        | -1.689 | <b>-1.401</b> | 0.047        | -0.263 | -0.216         | /            | /      | /             |
| <b>Thr83</b>  | -0.153       | -0.498 | -0.651        | 0.061        | -0.356 | -0.294         | /            | /      | /             |
| <b>Met85</b>  | /            | /      | /             | -4.318       | -1.087 | <b>-5.405</b>  | -0.197       | /      | -0.206        |
| <b>Trp86</b>  | -1.459       | -2.785 | <b>-4.244</b> | -1.980       | -3.588 | <b>-5.569</b>  | -4.826       | -1.134 | <b>-5.961</b> |
| <b>Trp117</b> | /            | /      | /             | 0.240        | -0.188 | 0.052          | 0.041        | /      | 0.039         |
| <b>Tyr119</b> | 0.016        | /      | 0.013         | -0.506       | -0.443 | -0.949         | 0.582        | -0.479 | 0.103         |
| <b>Gly121</b> | 0.518        | -0.401 | 0.117         | -0.641       | -1.281 | <b>-1.923</b>  | -0.281       | -1.001 | <b>-1.282</b> |
| <b>Tyr124</b> | -2.962       | -0.743 | <b>-3.705</b> | 0.349        | -1.203 | -0.853         | 0.267        | -2.417 | <b>-2.150</b> |
| <b>Gly126</b> | 0.048        | -0.055 | /             | /            | -0.033 | -0.033         | 0.582        | -0.479 | 0.103         |
| <b>Leu130</b> | 0.021        | -0.028 | /             | -0.954       | -1.270 | <b>-2.224</b>  | 0.201        | -0.750 | -0.549        |
| <b>Val132</b> | /            | -0.011 | /             | 0.050        | -0.271 | -0.221         | -0.013       | /      | -0.012        |
| <b>Trp286</b> | /            | -0.160 | -0.154        | /            | /      | /              | -0.035       | -0.183 | -0.218        |
| <b>Leu289</b> | /            | /      | /             | /            | /      | /              | -0.022       | /      | -0.019        |
| <b>Glu292</b> | 0.015        | -0.012 | /             | /            | -0.273 | -0.268         | -0.034       | -0.014 | -0.049        |
| <b>Val294</b> | -2.133       | -0.100 | <b>-2.233</b> | -5.611       | -1.581 | <b>-7.192</b>  | -1.997       | -1.391 | <b>-3.387</b> |
| <b>Phe295</b> | 0.561        | -0.246 | 0.316         | -0.571       | -1.956 | <b>-2.527</b>  | -0.119       | -0.883 | <b>-1.001</b> |
| <b>Arg296</b> | -3.321       | -0.929 | <b>-4.251</b> | 1.895        | -0.969 | 0.926          | -0.568       | -0.172 | -0.741        |
| <b>Tyr337</b> | -0.445       | -0.613 | <b>-1.058</b> | 0.014        | /      | 0.013          | /            | /      | -0.010        |
| <b>Phe338</b> | -0.311       | -0.900 | <b>-1.212</b> | -2.176       | -2.493 | <b>-4.668</b>  | -2.176       | -2.493 | <b>-4.668</b> |
| <b>Leu339</b> | /            | /      | /             | /            | /      | /              | -0.373       | -1.273 | <b>-1.646</b> |
| <b>Tyr341</b> | -7.206       | -1.806 | <b>-9.012</b> | -1.433       | -0.103 | <b>-1.536</b>  | 0.151        | -0.217 | -0.066        |
| <b>Ala343</b> | -0.448       | -0.442 | -0.891        | -1.352       | -1.046 | <b>-2.398</b>  | -0.383       | -0.762 | <b>-1.145</b> |
| <b>Val365</b> | /            | /      | /             | -0.212       | -0.726 | -0.939         | 0.034        | -0.035 | /             |
| <b>Ile451</b> | /            | /      | /             | 0.298        | -0.217 | 0.080          | /            | /      | -0.010        |

**Table 7.** The electrostatic, the van der Waals and the total contributions of the individual amino acid residues to the overall energy of the binding for the trajectories 4-6. The first 10 ns of the trajectories were omitted from calculations. The contributions over -1 kcal/mol are considered as significant and represented in bold.

| Residue       | Trajectory 4 |        |               | Trajectory 5 |        |               | Trajectory 6 |        |               |
|---------------|--------------|--------|---------------|--------------|--------|---------------|--------------|--------|---------------|
|               | Elec         | VdW    | Total         | Elec         | VdW    | Total         | Elec         | VdW    | Total         |
| <b>Tyr72</b>  | -0.327       | -1.614 | <b>-1.941</b> | -0.708       | -0.712 | <b>-1.420</b> | -1.506       | -0.967 | <b>-2.473</b> |
| <b>Asp74</b>  | -0.563       | -0.182 | -0.745        | -2.435       | -0.212 | <b>-2.646</b> | -0.132       | /      | -0.141        |
| <b>Thr75</b>  | -2.208       | -1.083 | <b>-3.291</b> | -0.071       | -0.054 | -0.125        | 0.078        | /      | 0.075         |
| <b>Leu76</b>  | -0.083       | -1.887 | <b>-1.970</b> | -0.039       | -0.160 | -0.199        | 0.093        | -0.628 | -0.535        |
| <b>Tyr77</b>  | -0.180       | -0.417 | -0.597        | /            | /      | /             | /            | /      | /             |
| <b>Thr83</b>  | 0.128        | -0.426 | -0.298        | /            | /      | /             | -0.011       | /      | -0.013        |
| <b>Met85</b>  | /            | /      | /             | -0.047       | -0.015 | -0.062        | /            | /      | /             |
| <b>Trp86</b>  | -0.636       | -1.741 | <b>-2.378</b> | -1.072       | -2.944 | <b>-4.016</b> | -2.489       | -5.550 | <b>-8.038</b> |
| <b>Trp117</b> | /            | /      | /             | /            | /      | /             | 0.061        | /      | 0.059         |
| <b>Tyr119</b> | -0.020       | /      | -0.017        | 0.059        | -0.014 | 0.045         | 0.950        | -0.338 | 0.611         |
| <b>Gly121</b> | 0.689        | -0.538 | 0.151         | 0.215        | -1.096 | -0.881        | 3.624        | -2.463 | <b>1.161</b>  |
| <b>Tyr124</b> | -4.161       | -1.309 | <b>-5.470</b> | -1.915       | -3.776 | <b>-5.692</b> | -0.982       | -4.118 | <b>-5.100</b> |
| <b>Gly126</b> | /            | /      | /             | 0.289        | -0.271 | 0.017         | 0.992        | -0.166 | 0.826         |
| <b>Leu130</b> | /            | /      | /             | 0.133        | -0.159 | -0.026        | 0.106        | -0.271 | -0.166        |
| <b>Val132</b> | /            | /      | /             | /            | /      | /             | /            | /      | /             |
| <b>Trp286</b> | -0.404       | -3.682 | <b>-4.086</b> | -1.200       | -1.936 | <b>-3.136</b> | -0.720       | -3.445 | <b>-4.165</b> |
| <b>Leu289</b> | /            | /      | /             | 0.357        | -0.774 | -0.417        | 0.176        | -0.115 | 0.061         |
| <b>Glu292</b> | -0.292       | -0.046 | -0.337        | -2.458       | -0.450 | <b>-2.908</b> | -0.012       | /      | -0.013        |
| <b>Val294</b> | 0.269        | -0.326 | -0.058        | -1.083       | -0.683 | <b>-1.766</b> | -1.126       | -0.127 | <b>-1.253</b> |
| <b>Phe295</b> | 0.309        | -0.026 | 0.283         | -0.224       | -0.656 | -0.880        | 0.035        | /      | 0.032         |
| <b>Arg296</b> | -0.012       | /      | -0.010        | -2.021       | -0.305 | <b>-2.326</b> | -1.905       | -0.197 | <b>-2.102</b> |
| <b>Tyr337</b> | -0.891       | -0.900 | <b>-1.791</b> | -0.244       | -0.715 | -0.959        | -1.639       | -2.142 | <b>-3.781</b> |
| <b>Phe338</b> | -0.341       | -1.275 | <b>-1.616</b> | 0.329        | -1.059 | -0.730        | 0.529        | -0.643 | -0.114        |
| <b>Leu339</b> | /            | /      | /             | /            | /      | /             | /            | /      | /             |
| <b>Tyr341</b> | -0.426       | -2.393 | <b>-2.819</b> | 0.036        | -1.478 | <b>-1.442</b> | -0.625       | -1.919 | <b>-2.545</b> |
| <b>Ala343</b> | -0.020       | -0.007 | -0.027        | 0.054        | -0.160 | -0.106        | -0.012       | -0.002 | -0.013        |
| <b>Val365</b> | 0.011        | -0.012 | -0.001        | 0.056        | /      | 0.055         | /            | /      | /             |
| <b>Ile451</b> | /            | /      | /             | 0.021        | -0.008 | 0.012         | /            | /      | /             |
